# Supplementary material for: The Immunity Protection of Central Nervous System Induced by Pseudorabies Virus DelgI/gE/TK in Mice
Source: Frontiers journal article supplement (doi:10.3389/fmicb.2022.862907), 2022-03-25
Supplement: Image_1.pdf [file Image_1.pdf]

1 Supplementary material:

**Vaccination**

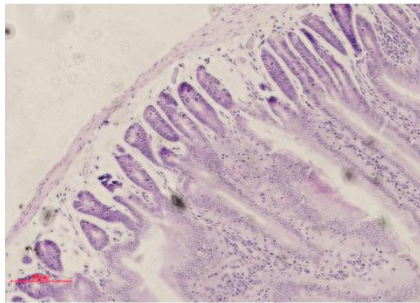

**Vehicle**

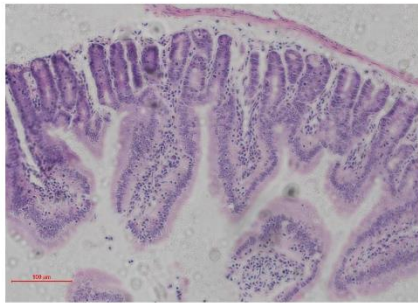

**Mock**

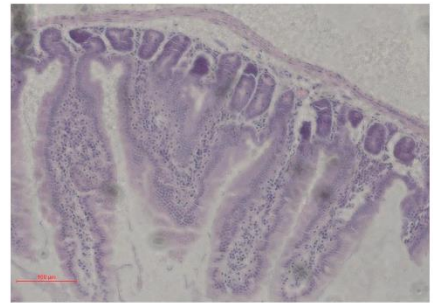

2  
3 **Fig.S1.** Histopathological observations of mice intestine injected with the indicated viral strain or  
4 DMEM. (hematoxylin and eosin staining, 200×magnification)
